# Supplementary material for: Transcriptional profiling of human microglia reveals grey–white matter heterogeneity and multiple sclerosis-associated changes
Source: PubMed Central journal article supplement (PMC6416318; doi:10.1038/s41467-019-08976-7), 2019-03-13

**A**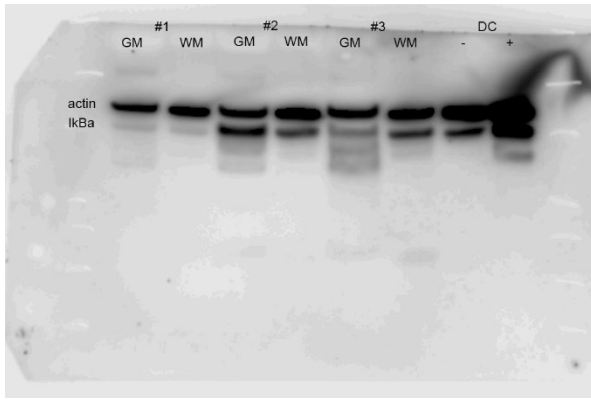**B**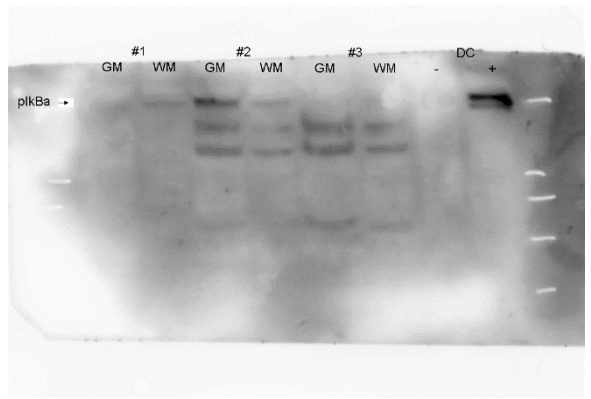**C**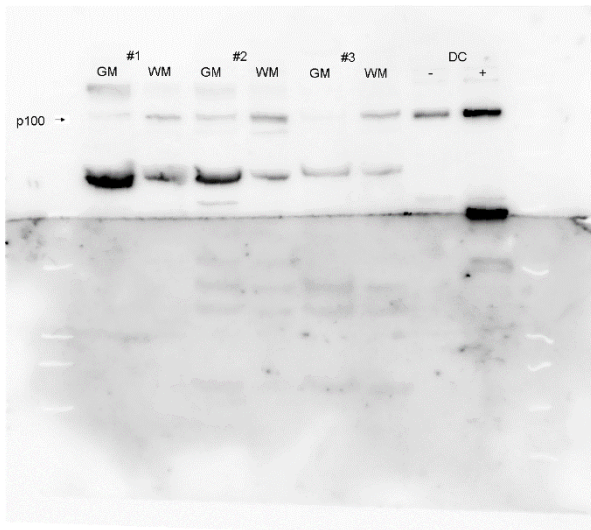**D**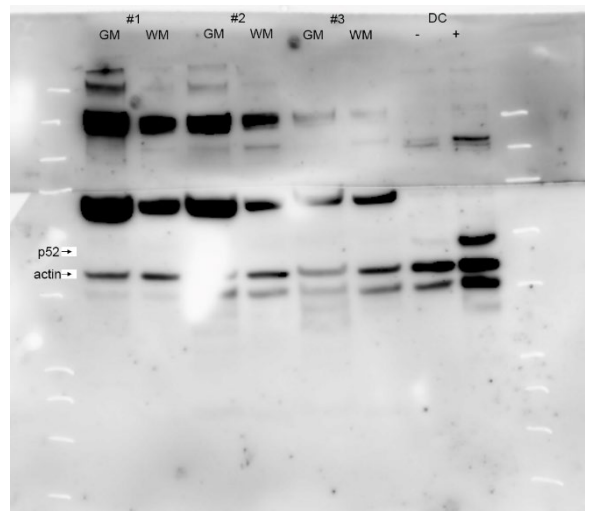

Supplement: 41467_2019_8976_MOESM12_ESM.pdf [file 41467_2019_8976_MOESM12_ESM.pdf]
