# Supplementary material for: Transcriptional profiling of human microglia reveals grey–white matter heterogeneity and multiple sclerosis-associated changes
Source: Nat Commun. 2019 Mar 13;10:1139. doi: 10.1038/s41467-019-08976-7 (PMC6416318; doi:10.1038/s41467-019-08976-7)
Supplement: Supplementary file 1 — Supplementary Information [file 41467_2019_8976_MOESM1_ESM.pdf]

**Transcriptional profiling of human microglia reveals grey–white matter  
heterogeneity and multiple sclerosis-associated changes**

van der Poel et al.

**Supplementary Table 1. Primer pairs used for RT-qPCR**

| <b>Gene symbol</b>      | <b>Forward sequence (5'–3')</b> | <b>Reverse sequence (5'–3')</b> |
|-------------------------|---------------------------------|---------------------------------|
| <i>ADGRG1</i>           | CTTCCAGCTTGTGTCCTCTA            | GCATGGACCAGTACCAGATGA           |
| <i>ADGRG1 (exon 15)</i> | CTCTCCTAAGAGGTTCTCTCCA          | CTACAACAGGCCAGCAATCTA           |
| <i>CD206</i>            | TGCAGAAGCAAACCAAACCTGTAA        | CAGGCCTTAAGCCAACGAAACT          |
| <i>CD45</i>             | GCAGCTAGCAAGTGGTTTGTTC          | AAACAGCATGCGTCCTTTCTC           |
| <i>CHI3L1</i>           | TTTGATGGGCTGGACCTTG             | GCTGGGCTTCCTTTATAAATTCTG        |
| <i>CHI3L1 (exon 10)</i> | GGTCCACAACACACAGATT             | AATCCCGAGTCTTACATTGC            |
| <i>CSF1R</i>            | GGCCTGCAAGGTTTTAACTG            | GAGAGGGTGAAGGTGTGC              |
| <i>CX3CR1</i>           | TTGGCCTGGTGGGAAATTTGT           | AGGAGGTAAATGTCGGTGACACT         |
| <i>EEF1A</i>            | AAGCTGGAAGATGGCCCTAAA           | AAGCGACCCAAAGGTGGAT             |
| <i>EEPD1</i>            | TGACACTCCTGAAAAACAGC            | TCCACTTGCGGATGTTGG              |
| <i>EEPD1 (exon 8)</i>   | GAACCCTTGGAATCCGGATAA           | CCTTCTTGCTCCAGTCCTTT            |
| <i>GAPDH</i>            | TGACCACCAACTGCTTAGC             | GGCATGGACTGTGGTCATGA            |
| <i>GPR34</i>            | GCGAACCTGAACCTTAATGCAA          | GTCGCAACCTTTCACCGTTT            |
| <i>LPL</i>              | ACTTGCCACCTCATTCCC              | ACCCAACTCTCATACATTCTG           |
| <i>LPL (exon 10)</i>    | CAGCCCTACCCTTGTTAGTTATT         | ACGTTGGAGGATGTGCTATTT           |
| <i>P2RY12</i>           | TTCAAACCCTCCAGAATCAACAG         | GTGCACAGACTGGTGTTACC            |
| <i>P2RY13</i>           | TATCCTCCCAAAGGTGACACTG          | TACCAGCTGTACTATCCGAGTG          |
| <i>SLC2A5</i>           | CCGTGTCCATGTTTCCATTTG           | CGCAGGCACGATAGAAAATATG          |
| <i>SLPI</i>             | CTGTGGAAGGCTCTGGAAAG            | TGGCACTCAGGTTTCTTGATC           |
| <i>TMEM119</i>          | CCACTCTCGCTCCATTCTG             | CAGCAACAGAAGGATGAGGA            |

**Supplementary Table 2. Antibodies used for Western blot analysis**

| <b>Antibody</b> | <b>Catalogus</b> | <b>Dilution</b> | <b>Company</b> |
|-----------------|------------------|-----------------|----------------|
| Beta-actin      | SC-47778         | 1:1,000         | Santa Cruz     |
| GPR56           | 358203           | 1:100           | BioLegend      |
| IkB $\alpha$    | 4814             | 1:500           | Cell Signaling |
| pIkB $\alpha$   | 9246             | 1:500           | Cell Signaling |
| p100/p52        | 05-361           | 1:500           | Millipore      |

**Supplementary Table 3. Antibodies and reagents used for flow cytometry**

| <b>Antibody/Reagent</b>           | <b>Clone</b> | <b>Fluorochrome</b> | <b>Dilution</b> | <b>Company</b> |
|-----------------------------------|--------------|---------------------|-----------------|----------------|
| CD11b                             | ICRF44       | PE                  | 1:200           | eBioscience    |
| CD14                              | MφP9         | APC-H7              | 1:100           | BD Biosciences |
| CD15                              | HI98         | PerCP-Cy5.5         | 1:20            | BD Biosciences |
| CD45                              | HI30         | BB515               | 1:200           | BD Biosciences |
| GPR56                             | CG4          | PE-Cy7              | 1:100           | BioLegend      |
| Fixable Viability Dye eFluor™ 506 | -            | -                   | 1:500           | ThermoFisher   |

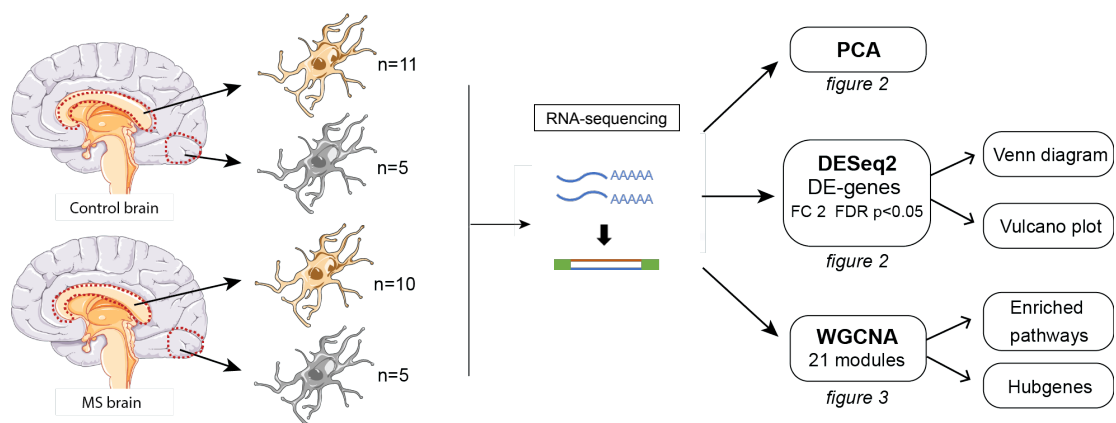

### Supplementary Figure 1. Experimental workflow for RNA-sequencing analysis of human microglia.

Microglia were isolated from control donors, GM (n=5) and WM (n=11) regions, and from MS donors, GM (n=5) and WM (n=10) regions. RNA-sequencing was performed and global gene expression was identified by PCA, differentially expressed genes were determined using DESeq2, and both Venn diagram and Volcano plots were generated. WGCNA was performed to identify co-expression networks and shows 21 modules, with enriched pathway analysis and hub genes. Images of the brain and microglia were adapted from Servier Medical Art by Servier licensed under a Creative Commons Attribution 3.0 Unported License.

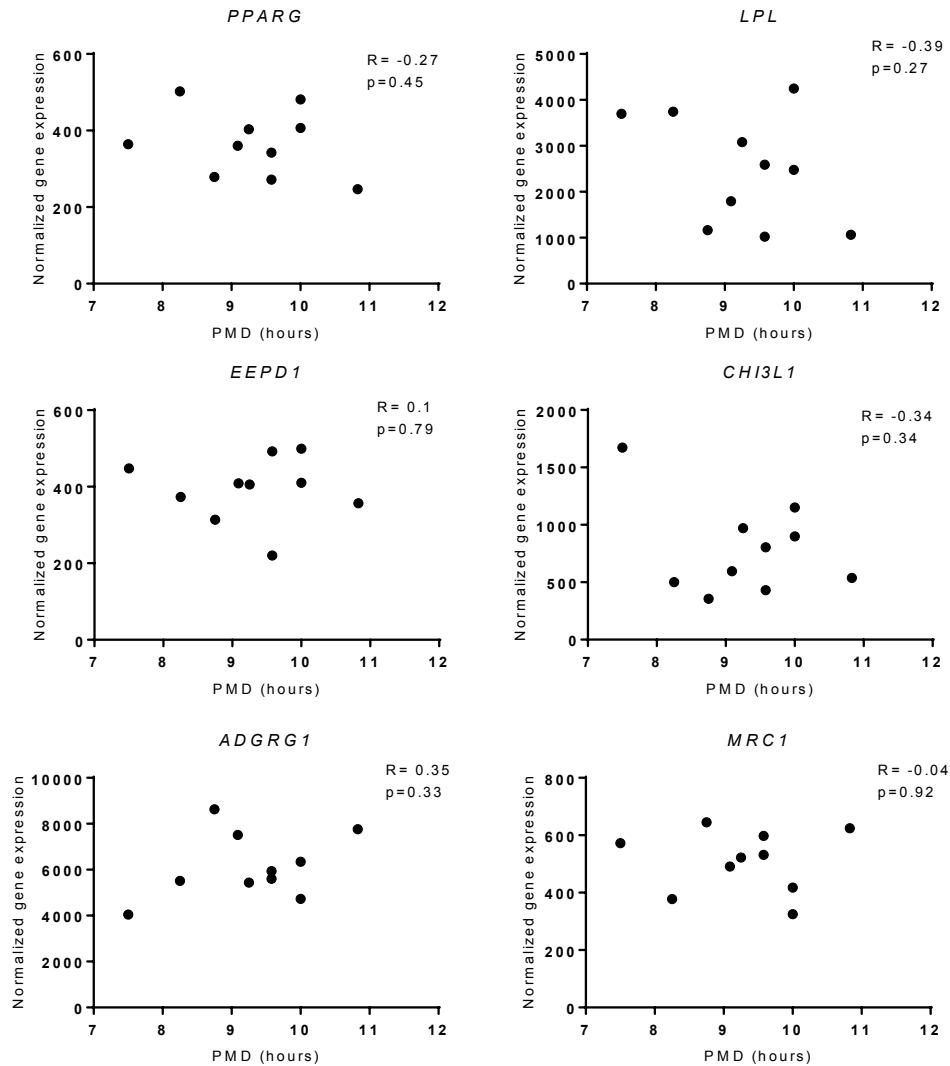

**Supplementary Figure 2. Correlations between post-mortem delay and MS-related DE-genes.**

MS-related DE-genes show no significant correlation with post-mortem delay (PMD) for *PPARG*, *LPL*, *EEPD1*, *CHI3L1*, *ADGRG1* and *MRC1* in 10 MS donors. Pearson correlation test.

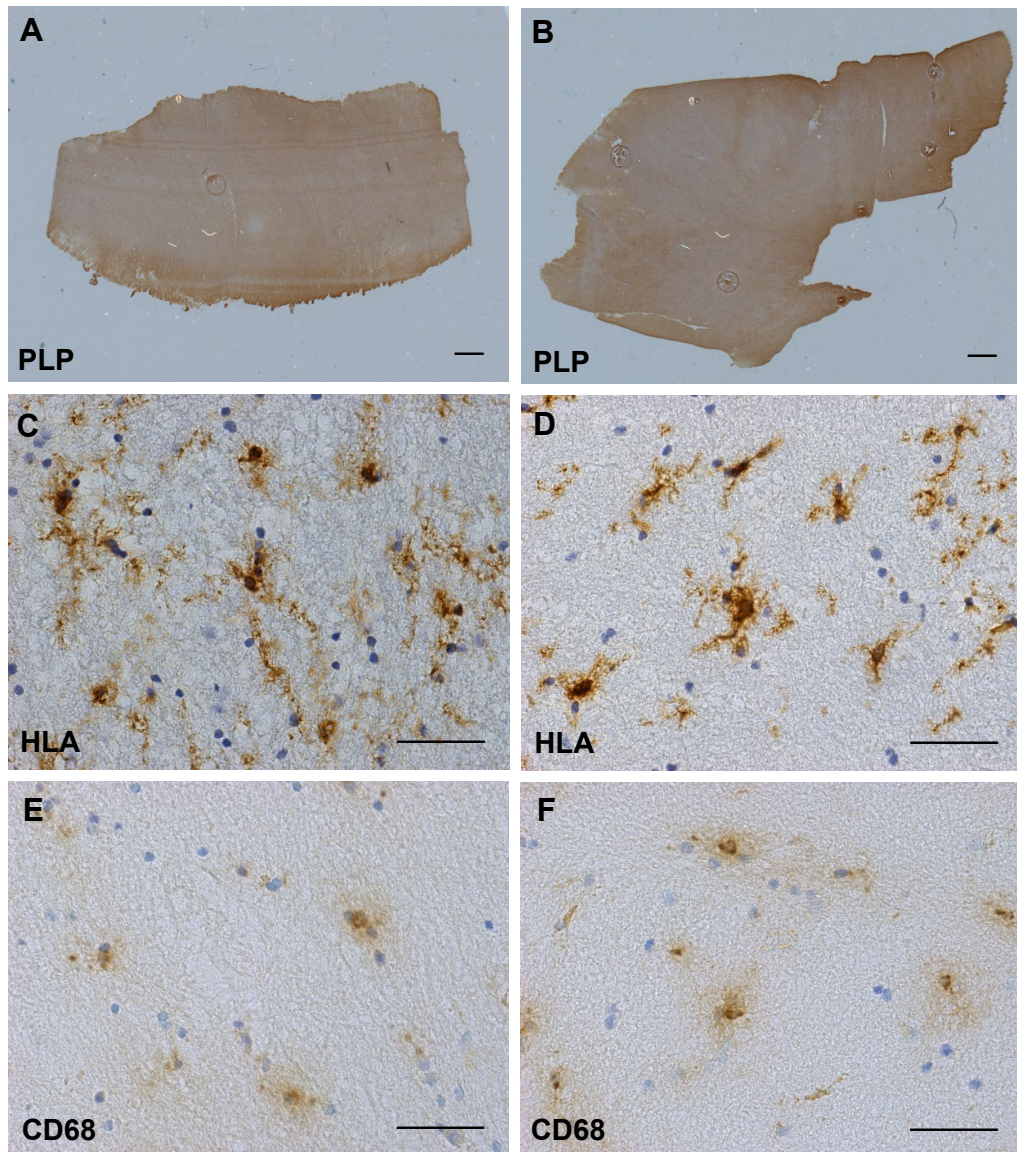

**Supplementary Figure 3. Myelin integrity and microglia morphology in control and MS WM tissue used for RNA-sequencing.** No signs of demyelination in WM tissue of MS (**A**) and control donors (**B**) based on myelin proteolipid protein (PLP) staining, scale bar 100  $\mu\text{m}$ . Microglia show ramified morphology and no difference in expression of activation markers HLA-DR and CD68 in both MS (**C**, **E**) and control donors (**D**, **F**), scale bar 50  $\mu\text{m}$ . Shown are representative stainings of a MS (NBB number 12-043) and a control donor (NBB number 11-044).

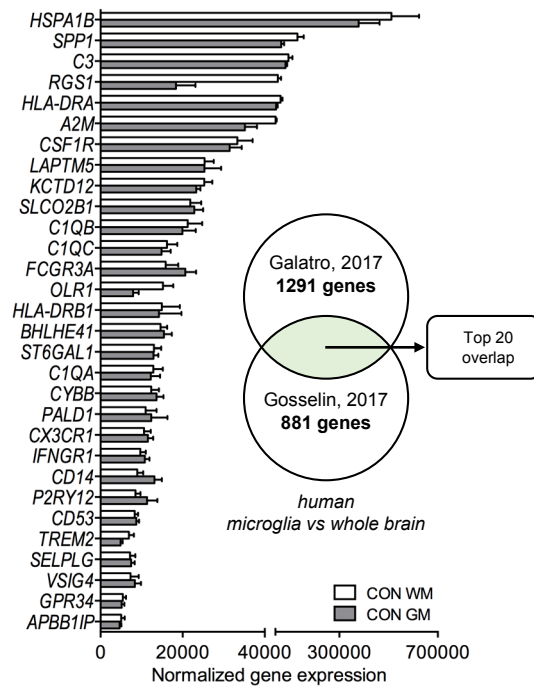

**Supplementary Figure 4. Expression of human microglia signature genes in grey-white matter microglia.** Expression of top 30 human microglia enriched genes, that overlap in two datasets<sup>2,3</sup> is conserved in GM and WM microglia in our dataset. Bars show mean with standard deviation.

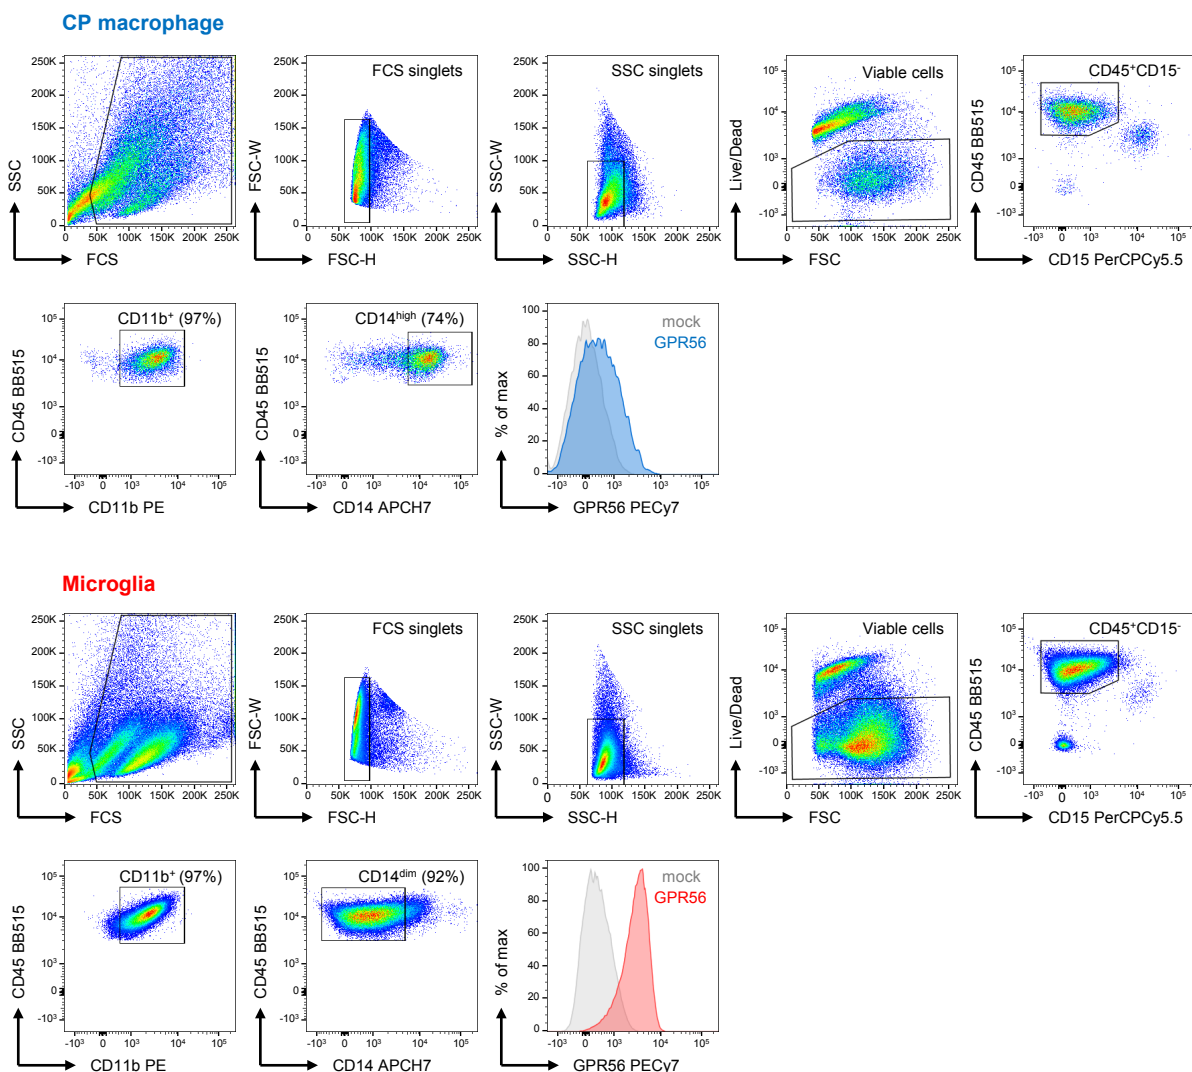

**Supplementary Figure 5. Flow cytometry gating strategy for human microglia and macrophages.**

Representative dot plots showing the gating strategy used for Figure 1E with from left to right: cell gating by forward scatter (FCS) and sideward scatter (SSC), FCS-width/height duplet exclusion, SSC-width/height duplet exclusion, gating of viable cells, gating of CD45<sup>+</sup>CD15<sup>-</sup> events, gating of CD11b<sup>+</sup> events, and gating of CD14<sup>dim/high</sup> events. Previous study shows high expression of CD14 by choroid plexus macrophages and CD14<sup>dim</sup> expression by microglia<sup>4</sup>. Representative histograms show GPR56 expression in CD14<sup>high</sup> CP macrophage and CD14<sup>dim</sup> microglia.

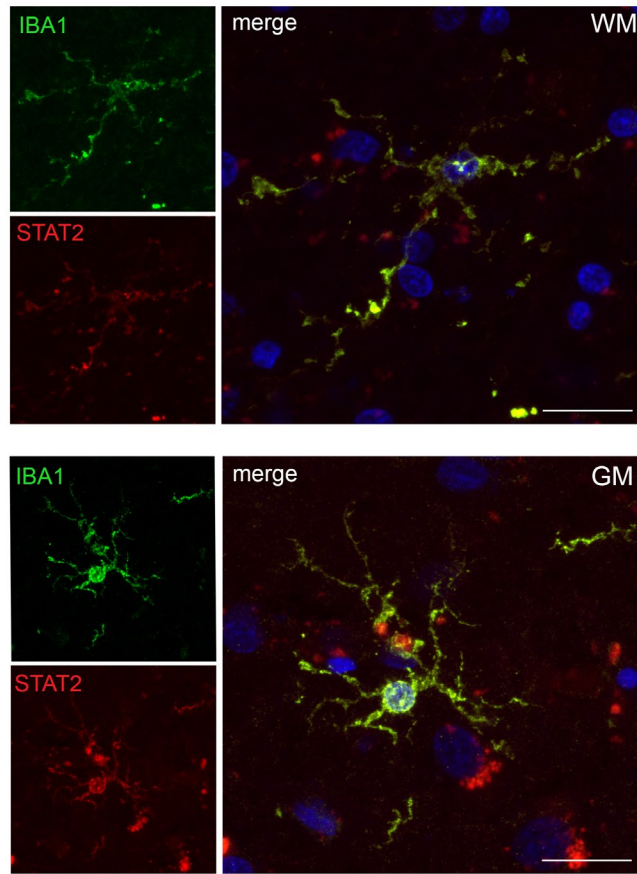

**Supplementary Figure 6. STAT2 expression by microglia in grey and white matter control tissue.** Immunohistochemical detection of the expression of STAT2 in WM and GM microglia in control brain tissue, confirmed in three donors. Scale bar is 20  $\mu\text{m}$ .

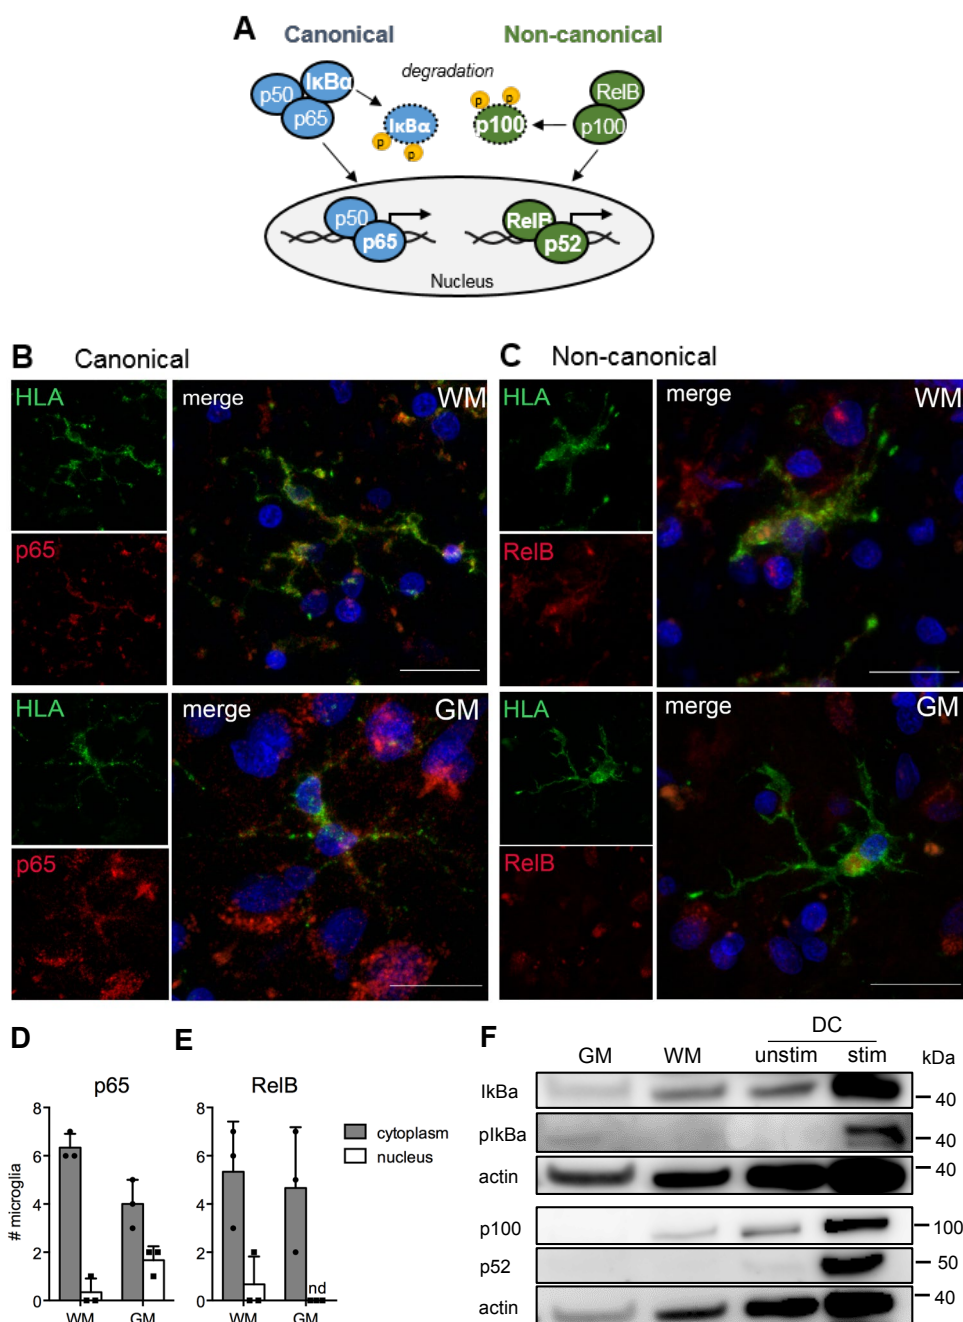

**Supplementary Figure 7. Marked expression of NF-κB subunits in grey and white matter microglia.**

**(A)** Schematic overview of canonical and noncanonical NF-κB pathways. **(B-E)** Immunohistochemical detection of the expression of NF-κB subunits p65 (canonical) and RelB (noncanonical) shows no nuclear translocation in major percentage of HLA-positive GM and WM microglia in control tissue, confirmed in three donors. **(F)** Western blot analysis shows no activation of NF-κB pathways in GM and WM microglia, as measured by phosphorylation status of IκBα (canonical NF-κB signaling) or processing of p100 to p52 (active noncanonical NF-κB signaling), confirmed in three donors. Monocyte-derived dendritic cells (DC) stimulated with anti-CD40 was used as positive control for NF-κB activation. Nd = not detected, scale bar is 20 μm. Bars show mean with standard deviation.



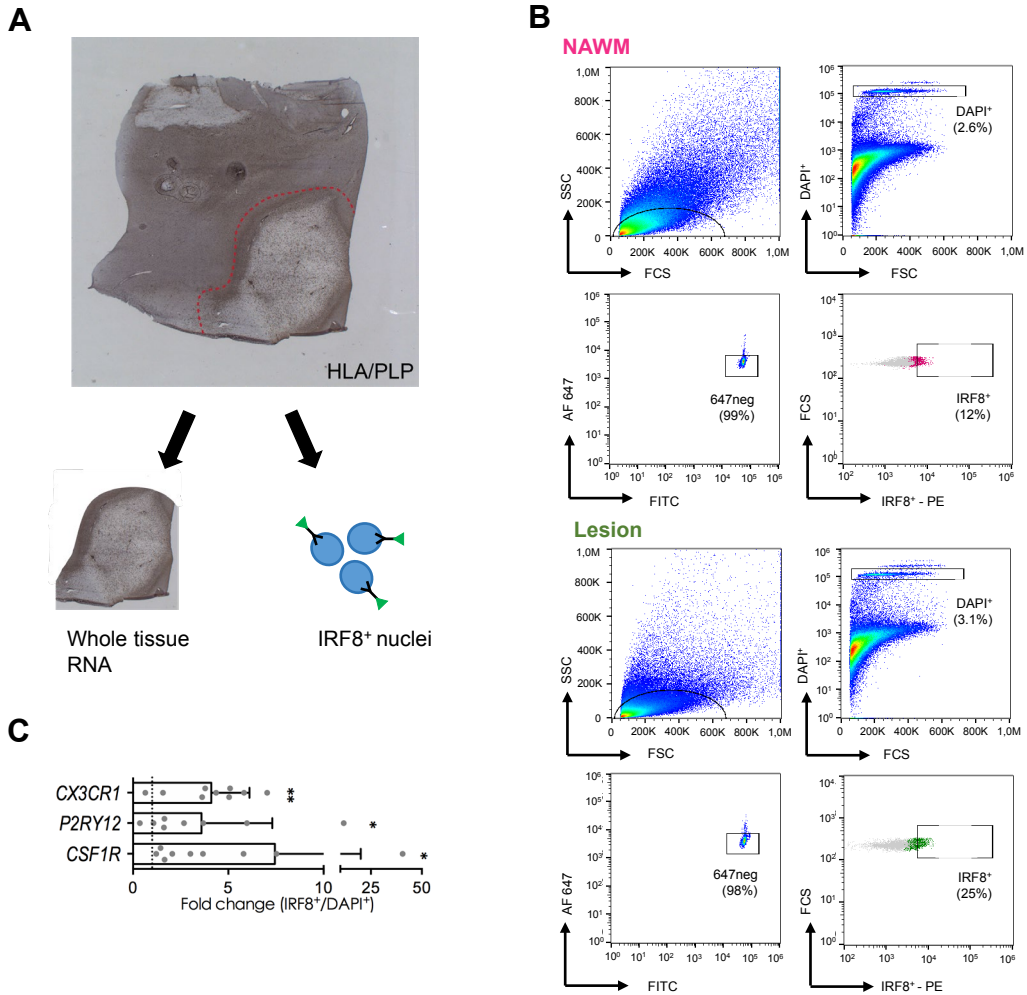

**Supplementary Figure 9. Whole tissue RNA and IRF8<sup>+</sup> nuclear RNA from NAWM and active MS lesions for gene expression analysis.**

**(A)** RNA was isolated from whole tissue and sorted IRF8<sup>+</sup> nuclei obtained from NAWM tissue (n=7) and dissected MS lesions (n=5). **(B)** Representative dot plots showing the gating strategy for sorting of IRF8<sup>+</sup> nuclei from NAWM or a MS lesion from left to right: small nuclei selection based on sideward scatter (SSC) and forward scatter (FSC), DAPI<sup>+</sup> nuclei selection, nuclei negative for autofluorescence signal in 647 channel, and selection of IRF8<sup>+</sup> nuclei compared to isotype control. **(C)** IRF8<sup>+</sup> nuclei from WM tissue (n=9) show enriched expression of microglia genes *CX3CR1*, *P2RY12*, and *CSF1R* compared to complete DAPI<sup>+</sup> fraction (n=9). Wilcoxon test or one-tailed paired t-test: \*  $p < 0.05$ , \*\*  $p < 0.01$ . Bars show mean with standard error.

## References

1. Luchetti, S. *et al.* Progressive multiple sclerosis patients show substantial lesion activity that correlates with clinical disease severity and sex: a retrospective autopsy cohort analysis. *Acta Neuropathol.* **135**, 511–528 (2018).
2. Gosselin, D. *et al.* An environment-dependent transcriptional network specifies human microglia identity. *Science.* **3222**, 33–35 (2017).
3. Galatro, T. F. *et al.* Transcriptomic analysis of purified human cortical microglia reveals age-associated changes. *Nat. Neurosci.* **20**, 1162–1171 (2017).
4. Melief, J. *et al.* Microglia in normal appearing white matter of multiple sclerosis are alerted but immunosuppressed. *Glia* **61**, 1848–1861 (2013).
